# Supplementary material
Source: Springer Nature journal article supplement (https://www.springermedizin.de/resource/supplementary/13058_2008_2118_MOESM6_ESM.pdf/9700674)

**A)**

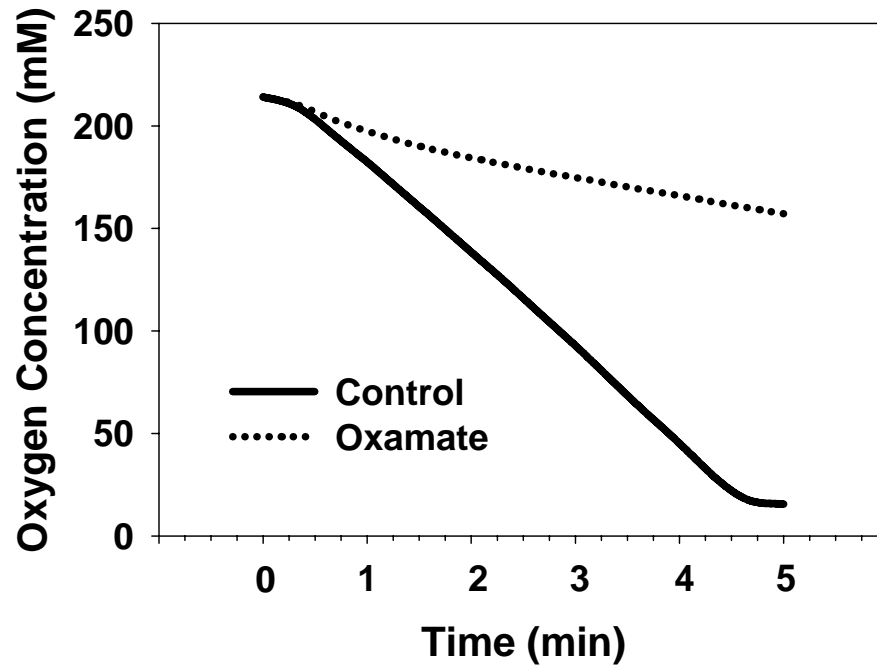

**B)**

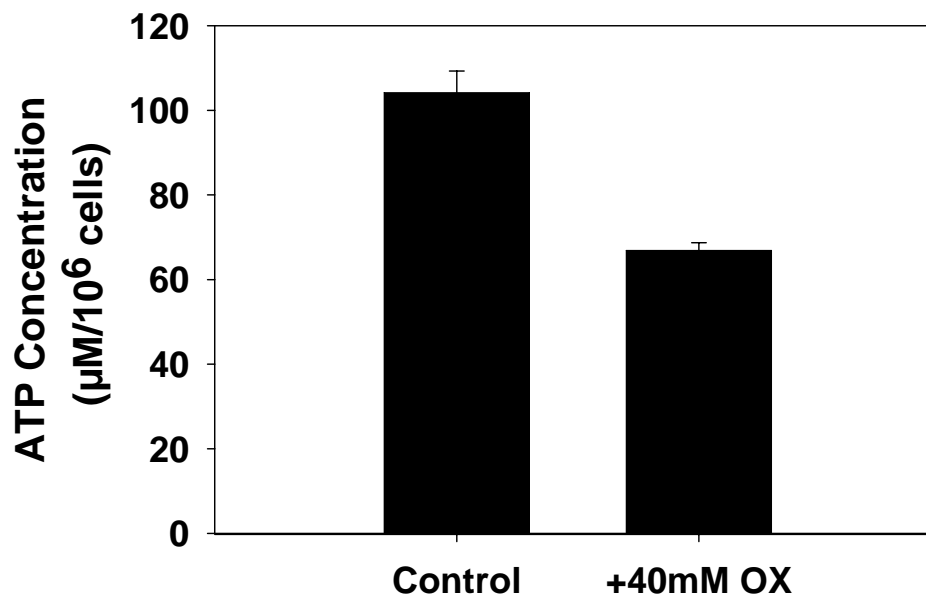

Supplement: MOESM6 [file 9700674]
